# Supplementary material for: Proteomic analysis and interactions network in leaves of mycorrhizal and nonmycorrhizal sorghum plants under water deficit
Source: PeerJ. 2020 Apr 23;8:e8991. doi: 10.7717/peerj.8991 (PMC7183753; doi:10.7717/peerj.8991)
Supplement: Data_1 [file peerj-08-8991-s009.xlsx]

## Sheet: Hoja1
a Spot number assigned by Melani program
b Experimental molecular mass (kDa)/isoelectric point
b Theoretical molecular mass (kDa)/isoelectric point
a Spot number	b Mm (kDa)/pI (Exp.)	c Mm (kDa)/pI (Theor.)	Number of aa	Peptide sequence	Charge	M+ H	SEQUEST Score	Coverage (%)	Peptide Matched	Blast score	Identity	Sorbidraft accession	Description
6	12.10/4.97	19.35/8.69	183	NAVDEVLVADEK	2	1301.98	85.11	46.99		1e-131	100	sb08g005260	Thioredoxin M-type
				KESVIGAVPK	2	1027.83
				MIAPVIDELAKDYAGK	2	1749.84			5
				ITCCKVNTDESPNVASTYGIR	3	2384.89
				SIPTVLIFKAGE	2	1403.45
29	15.50/5.49	21.66/9.21	207	IFGKDDEIIVGcQSGKR	2	1922.14	62.48	28.5		4e-150	100	sb10g030520	Thiosulfate sulfurtransferase 16, isoform X1
				TEGEFSAGHPEGAVNIPYmNK	3	2265.01
				DDEIIVGcQSGK	2	1320.97			5
				SVPVRVAYELQQAGHR	2	1810.32
				YLDVRTEGEFSAGHPEGAVNIPYmNK	3	398.836
34	15.9/5.88	17.85/5.82	158	VEVEDGNILQISGER	2	1658.03	26.36	39.24		1e-111	100	sb01g040030	17.9 kDa class I heat shock protein
				TSSETAAFAGAR	2	1169.7
				IDWKETPEAHVFK	2	1599.68			5
				AAmENGVLTVTVPK	2	1446.96
				FRLPENAK	2	974.972
47	18.90/5.05	27.26/5.69	256	LYAHFVTAPNAEWSR	2	1761.69	73.49	35.55	6	0	100	sb07g027960	Thylakoid lumenal 19 kDa protein
				ADGAGQVYYEYEVAGAGAHSLISVTcAR	3	2915.96
				KDTAEYVYDVPEGWk	3	1799.97
				NKLYAHFVTAPNAEWSR	3	2004.94
				TEKEYLTFLSGIR	3	1557.01
				VEKGTNGTDSEFFNPR	2	1798.41
65	22.60/5.05	24.35/8.69	227	ALVVDDLIATGGTLcAAVK	2	1887.23	96.63	48.9	8	2e-160	100	sb08g019790	Adenine phosphoribosyl transferase
				KLPGEVISEEYSLEYGTDK	2	2157.26
				VVEcAcVIELPELKGR	2	1872.12
				GFIFGPPIALAIGAK	2	1472.1
				DQGITVVAGVEAR	2	1314.94
				YKDQGITVVAGVEAR	2	1606.16
				IEMHVGAVQANDR	2	1439.91
				LGDRPVFVLVEADA	2	1500.51
70	23.3/5.35	26.96/5.36	253	RALLGESNEFVGDKVAYALSQGLK	3	2410.3	225.74	74.31		0	100	sb03g006130	Triosephosphate isomerase
				SLLRPEFHVAAQNcWVK	3	2056.18
				IIYGGSVTAANCK	2	1354.11
				VATPAQAQEVHASLR	2	1577.87
				VIACVGETLEQR	2	1375.35			9
				INVSPEVAESTR	2	1301.89
				EAGSTMEVVAAQTK	2	1421.89
				ISDWSNVVVAYEPVWAIGTGK	3	2291.26
				GGAFTGEVSAEMLVNLGVPWVILGHSER	3	2942.19
72	23.5/5.03	32.36/6.45	304	KEDIDGFLVGGASLK	2	1548.54	633.59	62.5		0	100	sb02g031030	Triosephosphate isomerase
				GGAYTGEISAEQLVDIGVQWVILGHSER	3	2984.17
				VATPEQAQEVHAAVR	2	1606.82
				APDFATIVNSVTAKK	2	1562.14
				IEVSAQNVWIGK	2	1344.09
				RHIIGEDDEFIGKK	2	1529.3			12
				TFDVCFTQMK	2	1276.77
				LIACIGELLEEREAGK	2	1800.85
				IIYGGSVNAANCAELAKK	2	1879.23
				KAAYALSQNVK	2	1193.09
				TNVSPEVASSTR	2	1247.86
				AFADSISNWADVVIAYEPVWAIGTGK	2	2780.93
73	22.5/4.14	26.73/4.84	247	AEAAADSYASALSEVAVENGTLEQTVSDLEKLQK	3	3538.19	171.71	45.75	5	4e-177	100	sb04g027810	ATP synthase delta chain
				LKTQLDPELIAGFTVQYGR	2	2150.28
				SYELQPHVVNFINVVVDNFR	3	2390.04
				IFADETVAEFFDNPTVPREEK	3	2452.75
				KQIEEITSEFELPDVPLEV	2	2216.2
91	25.80/4.52	23.80/4.64	221	RADPASPYTVAQYNSPFEFSGR	3	2459.02	15.43	31.22		6e-160	100	sb03g002090	Heme-binding protein 2
				FGGFVADADVGEQAAQLDASLQGTR	3	2523.62			3
				YTDAmWITTAPIEDISFVAATR	3	2488.91
102	27.10/4.31	22.70/4.34	207	IEDLSSQLQTQAAEQFK	3	1936.57	21.39	35.75	6	4e-145	100	sb07g026160	Nascent polypeptide-associated complex subunit alpha-like protein 1
				NMLFVISKPDVFK	2	1554.17
				SPNSDTYVIFGEAK	2	1527.2
				DIELVMTQATVSR	2	1478.38
				SKNMLFVISKPDVFK	3	1769.29
				ASNGDIVTAImELTN	2	1565.09
104	28.10/6.23	35.08/9.45	316	VSEmLGNVNTSSALSAFEKmEEK	3	2533.79	179.3	56.33		2e-178	99.61	sb03g042550	Probable membrane-associated 30 kDa protein
				ILEQAVLEMNDDLTK	2	1731.68
				VmAmESQAEALGQLATDDLEGK	2	2339.88
				FALLETSSVDDDLSQLK	2	1882.11
				SYANSVLSSFEDPEK	2	1672.99
				AAVSNSGAGRPFPDLEIESELNELR	3	2672.24			10
				YKAAEQASADWYR	2	1559
				ELSGSSLKGELPPGR	2	1527.05
				SYADNASSLR	2	1083.8
				QATAQVLASQK	2	1144.89
108	27.90/4.95	28.67/4.80	253	AAQDIALAELAPTHPIR	3	1787.38	55.96	49.8		0	100	sb07g025680	14-3-3-like protein GF14-C
				GKIEAELSNIcDGILK	2	1760.16
				QAFDEAISELDTLGEESYK	2	2145.15
				TVDVEELTVEER	2	1419.09
				YEEmVEYmEK	2	1382.22			9
				NLLSVAYKNVIGAR	2	1518
				KESAESTMVAYK	2	1343.86
				LLDSHLVPSSTAAESK	2	1655.16
				ESAESTmVAYK	2	1231.88
111	28.90/4.98	31.73/5.78	288	VKPLAALAmIDEGELDWK	3	2015.24	152.7	38.19		0	100	sb04g034340	Inorganic pyrophosphatase 6
				MEVATDEAFTPIKQDTK	2	1940.05
				ASLVNDVDDVEK	2	1304.1
				AGDGVFHFVVEIPKESSAK	2	2018.2			8
				AQGQPETLDYR	2	1277.83
				DYKIPDGKPANR	3	1374.72
				VIEETNESWEK	2	1363.99
				VSPWHDVPLR	2	1205.72
113	29.10/4.91	30.50/8.84	290	TKGSLAQLPPLEVPR	2	1605.68	19.25	27.59		0	100	sb05g023220	Plastid-lipid-associated protein 6/fibrillin
				ELEAAGTAAGGPVDLNGGDLDKLQGR	2	2524.63
				LLSAVSGLNR	2	1029.92			5
				LLPVTLGQVFQR	2	1370.92
				GLAASQEDLDRADAAAR	2	1729.68
114	30.9/6.67	27.36/6.10	263	DHAGPLRPGVDAVESTVK	2	1847.69	95.03	36.82		0	100	sb02g042550	Stress-related protein
				ELVAEAQQSGVKGAAR	2	1614.31
				FGGLPLDVLAFVDR	2	1519.07			6
				VFSSPDAEPLAAESQ	2	1548.28
				YEPAAEHLAVSAWR	2	1600.32
				VDDTVHEVDKHLPGALK	3	1872.55
131	33.2/6.23	33.51/5.90	299	VVPILVGALSSQSEAmYGQLLSK	2	2406.59	31.27	35.79		0	100	sb03g046030	Protein MEMO 1
				ASHAGSWYTNNAR	2	1435.84
				EYLQEYENTIcGR	2	1675.19
				mGmEIIETGDPVAFK	2	1670.09			7
				AVIAPHAGYSYSGR	2	1449
				NFFSVSSDFcHWGSR	2	1832.93
				VFLLGPSHHYYTPK	3	1658.91
138	34.30/5.52	42.11/8.47	402	AVAAEVEGLNIADNVTQLIGK	3	2125.8	40.36	27.36		0	100	sb03g009260	Cysteine synthase1
				TPNSYmLQQFDNPANPK	2	1980.52
				AFGAELVLTDAAK	2	1305.95
				VHYETTGPEIWEDSK	2	1790.69			7
				GKVDIFIGGIGTGGTISGAGR	2	1933.29
				TPmVYLNNVVK	2	1294.09
				IGYSmINDAEER	2	1414.06
142	35.00/6.51	37.66/6.23	346	LTPDEmAELESYAAAGEVLGDR	2	2353.34	313.63	52.89		0	100	sb10g001900	Probable aldo-keto reductase 2
				IENFNQNVGALSVK	2	1533.25
				ELGIGIVAYSPLGR	2	1445.38
				LIHHAVAAGVTLLDTSDIYGPHTNEILLGK	3	3169.41
				RLGVDcIDLYYQHR	2	1808.32
				YIGLSEASASTIR	2	1367.93
				LVDSLSEQDFRK	2	1436.98			13
				IFEHVNAmAAK	2	1247.72
				DVEEDIIPTcR	2	1347.01
				YPQmANTWK	2	1154.75
				FGLSFADGKR	2	1097.69
				KVPIEVTIGELK	2	1325.67
				DSETPPLSSWK	2	1246.85
143	34.30/5.09	36.26/5.10	322	AHQVVEDGYEFFADR	2	1782.95	48.19	39.13	8	0	0.9783	sb01g039930	Serine/threonine-protein phosphatase PP1 isoform X1, Zea mays (GI: 103634267)
				GVSYTFGADKVSEFLQK	2	1876.3
				EIFLSQPNLLELEAPIK	2	1954.38
				IcGDIHGQYSDLLR	2	1647.3
				VFTEcFNTLPVAALIDDK	2	2054.16
				QSLETIcLLLAYK	2	1552.18
				QVQLSESEIR	2	1189.52
				LFEYGGFPPEANYLFLGDYVDR	3	2583.3
144	35.10/5.78	35.63/7.63	340	LNPLVSSLSLYDIAGTPGVAADVSHINSPALVK	3	3319.41	263.07	62.35		0	100	sb03g029570	Malate dehydrogenase,
				KVAILGAAGGIGQPLSLLmK	2	1953.46
				GFmGEEQLGEALEGSDVVIIPAGVPR	2	2686.79
				DDLFNINAGIVKNLSAAIAK	3	2087.76
				ANLPVTDVNVPVVGGHAGITILPLFSQATPATNSLSDEDIK	3	4171.99			9
				KLFGVTTLDVVR	2	1347.55
				NGVEEVLGLGELSDFEKEGLEK	2	2392.35
				YcPNALVNmISNPVNSTVPIAAEVFK	2	2864.85
				TQDGGTEVVEAK	2	1234.06
147	36.40/6.16	39.58/5.94	361	VFYNHcIQNNISLK	2	1750.28	35.33	37.95		0	100	sb08g000220	Glucuronokinase 1
				VAQVYGGLVYmDFSQEHmGK	3	2291.91
				ALSFTIADFSATVR	2	1498.68
				EAcQEAGFVIQQVK	2	1606.44
				mKEVAQLAFDGHK	2	1490.03			9
				WLDGDEFIISR	2	1351.59
				VGLLGNPSDVYGGR	2	1403.51
				AENFTLSYDTNIPR	2	1640.65
				FTGSGGAVVALcPDGDSQVEHLR	3	2372.85
162	40.80/6.19	49.37/8.38	462	AGLAALNLGYAGGEAVSTmVK	2	2009.16	49.19	29.44		0	100	sb09g021360	Bifunctional aspartate aminotransferase and glutamate/aspartate-prephenate aminotransferase
				ISYAAAmSTLQAAmGK	2	1645.68
				LLVLSDEIYEHIIYQPAK	2	2143.86
				IQSQYTSGASSISQK	2	1585.94
				ELLEEIAAIVR	2	1255.88			9
				ILILcSPSNPTGSVYPK	2	1846.35
				TmAITDQATALR	2	1308.07
				IKEAmALLKPPVAV	2	1496.35
				DSESLcLFLLEK	2	1453.22
172	46.10/6.33	54.41/8.86	487	GQETSTNSIASIFAWTR	2	1869.04	74.45	42.09		0	100	sb06g022050	NADP-Isocitrate dehydrogenase
				FKDIFQEVYEEQWK	2	1890.09
				DATNDEVTVESAEATLK	2	1793.3
				AFAESSmAmALSK	2	1375.91
				GPGVALSmYNVDESIR	2	1723.68
				TLEAEAAHGTVTR	2	1355.99
				LESAcVETVESGK	2	1408.31
				VQNPIVEmDGDEmTR	2	1766.1			15
				LIDDMVAYAVK	2	1237.95
				DLALLIHGPK	2	1076.43
				FEANSIWYEHR	2	1452.03
				LIFPYLELDVK	2	1350.18
				SDGGYVWAcK	2	1142.87
				NILNGTVFREPILcK	2	1775.1
				mVFVPDGADPmELDVYDFK	2	2220.03
176	44.00/5.23	42.480/5.18	377	LAYIALDYEQELETAK	2	1870.34	161.67	45.89		0	99.4	sb09g000730	Actin-97 isoformX2, Zea mays (GI: 103629276)
				KDLYGNIVLSGGSTmFPGIADR	2	2327.59
				YPIEHGIVSNWDDMEK	2	1933.21
				VAPEEHPVLLTEAPLNPK	2	1954.45
				SYELPDGQVITIGAER	2	1748.67
				TTGIVLDSGDGVSHTVPIYEGYALPHAILR	3	3152.43			11
				EEYDESGPAIVHR	2	1502.07
				GYSFTTSAER	2	1119.26
				AGFAGDDAPR	2	976.949
				DAYVGDEAQSK	2	1182.42
				IWHHTFYNELR	2	1515.86
189	63.12/5.62	55.69/5.87	507	IIGLGEIMSGELVEFAEGTR	2	2136.65	149.75	41.22	14	0	93.38	NA	ATP synthase Sorghum bicolor (GI: 4549115)
				HLKDTKPQFQEIISSSK	2	1986.39
				ERHTLIIYDDLSK	2	1602.99
				NVGIVLmGDGLmIQEGSFVK	2	2139.52
				GYLDSLEIEQVKK	2	1522.08
				RSVYEPLQTGLIAIDSmIPIGR	3	2445.72
				QSQSNPLPVEEQVATIYTGTR	2	2319
				EAYPGDVFYLHSR	2	1554.07
				TAVATDTILNQK	2	1274.99
				IAQIPVSEAYLGR	2	1417.05
				VINALAKPIDGR	2	1266.34
				VVQVGDGIAR	2	1013.91
				TFTEQAETLLK	2	1281.03
				LIESPAPGIISR	2	1252.88
191	63.25/5.89	57.45/5.64	525	LALVTGGEIASTFDNPESVK	2	2048.08	59.03	33.33		0	100	sb03g009490	T-complex protein 1 subunit beta
				QAILLSATEAAEmILR	2	2048.08
				ILVANTAmDTDKVK	2	1534.89
				TDLmNIAmTTLSSK	2	1584.96
				DSFLDEGFILDKK	2	1526.96
				mASFIGAMAIADLIK	2	1584.96			11
				VDEIITcAPR	2	1173.83
				GASEHVLDEAER	2	1312.69
				VIEEImIGEDR	2	1320.63
				ENcTAGIDVITGSVGDmQK	2	2010.96
				VADIEAAEK	2	945.841
				VQDDEVGDGTTSVVVLAGELLK	3	2245.33
204	74.92/5.61	68.44/5.37	621	EVLQREDDLNEIVQLVGK	2	2097.23	225.56	58.29		0	100	sb04g005040	V-type proton ATPase catalytic subunit A
				LVSQKFEDPAEGEEALVAK	2	2060.02
				GVSVPALDKDVLWEFQPK	2	2028.43
				LAEmPADSGYPAYLAAR	2	1812.01
				DMGYNVSmmADSTSR	2	1696.56
				EDDLNEIVQLVGK	2	1472.34
				VLDALFPSVLGGTcAIPGAFGcGK	2	2407.24
				LLREDYLAQNAFTPYDK	2	2057.33
				TTLVANTSNMPVAAR	2	1546.11
				DALAESDKITLETAK	2	1603.87
				KVSGPVVVADGmGGAAmYELVR	2	2238.48
				EASIYTGITIAEYFR	2	1733.84			24
				VTTFEDSEKESEYGYVR	2	2039.02
				NIIHFNTLANQAVER	2	1739.68
				VGHDNLIGEIIR	2	1335.74
				ALESFYEKFDPDFIDIR	3	2105.35
				LAADTPLLTGQR	2	1255.92
				LYDDLTNGFR	2	1212.98
				YSNSEAVVYVGcGER	2	1689.97
				LEGDSATIQVYEETAGLmVNDPVLR	3	2736.76
				VSYIAPAGQYSLQDTVLELEFQGIK	3	2770.29
				KFTmLQTWPVR	2	1423.9
				SGDVYIPR	2	906.434
				ALESFYEK	2	986.053
239	25.60/5.19	27.15/5.18	250	LAWHSAGTFDVATK	3	1503.77	21.65	34.8		0	100	sb02g044060	Ascorbate Peroxidase 2
				YAADEDAFFADYAEAHLK	2	2047.29
				NPAEQAHGANAGLEIAVR	2	1817.52			5
				LPDATQGSDHLR	2	1310.01
				QVFSTQmGLSDQDIVALSGGHTLGR	3	2633.6
240	21.9/5.41	21.3/11.22	184	CYEcGETGHFAR	2	1486.19	44.98	25.27		1e-125	100	sb10g005960	Splicing factor RSZ21 arginine/serine-rich
				KPPGFAFIDFDDKR	2	1653.37			4
				DAEDAIRDLDGK	2	1317.82
				LYVGNLDPR	2	1046.84
243	19.40/4.99	24.62/6.00	218	mKFNSNQIPEAK	2	1423.3	33.86	24.77		6e-164	100	sb06g023900	NAD(P)H-quinone oxidoreductase subunit M
				LIGSDLEHYIR	2	1316.08
				EYGGQWLScTTR	2	1457.98			5
				VLNFSmGKPR	2	1165.04
				KGDAQSLPR	2	971.791
244	28.20/6.12	34.08/6.81	313	HGANAGLVNALK	2	1164.83	85.06	41.21		0	100	sb08g004880	Probable L-ascorbate peroxidase 6
				YATDQDAFFEDYAEAHAK	3	2092.7
				RDEDLLVLPTDAVLFEDSSFK	2	2408.87
				MGLNDKEIVALSGAHTLGR	3	1982.79			8
				VDVTAPEQcPPEGR	2	1555.08
				LGWHDAGTYDK	3	1263.1
				LPAAGPPSPAEHLR	3	1413.96
				YTKDGPGAPGGQSWTSQWLK	3	2164.85
259	15.70/5.43	18.07/5.39	167	KYGAKPDIETLDILNTTATQK	2	2320.03	73.5	58.68		3e-119	100	sb09g004470	Universal stress protein PHOS32
				LcQVIHDTPLScLVIGSR	2	2068.27
				AGDHLLLLHVIK	3	1328.71			6
				WVGLATDFSEGSR	2	1425.86
				VLLGSVSDYVVNNATcPVTVVK	2	2334.5
				AALRWAAANLLR	2	1325.43
263	27.10/6.45	31.44/7.76	302	VIIADVQDDLGHAVATELGADAVR	3	2449.89	206.03	71.85	12	0	100	sb02g042150	Momilactone A synthase
				TGSIIcTASTTAVLGDmAPTPYcVSK	3	2717.63
				LDVmYNNAGIGGDmAASSLGAIDLADFDR	3	3005.62
				ILERDmNEmAGPVLEAEDIAR	3	2404.19
				YVNGQNLVVDGGYTVSK	2	1813.24
				cDVTDEAQVAAAVDLAVQLHGR	3	2339.08
				VNAISPHAIPTPLAmATmAQWFPDR	3	2767.99
				RTGSIIcTASTTAVLGDmAPTPYcVSK	3	2874.33
				VAVVGIVRAVAGQmAR	3	1613.77
				VAVITGGASGIGKATAAEFVR	2	1975.7
				AAVYLASDEAKYVNGQNLVVDGGYTVSK	3	2933.14
				LAGKVAVITGGASGIGK	2	1499.31
266	38.89/5.33	45.15/6.00	422	LHGGTPANFLDVGGSASEGQVVEAFK	3	2588.15	355.18	60.19	19	0	100	sb04g026360	Succinyl-CoA ligase subunit beta
				GGTSIEDLAEKYPDmIIKVPIDVFK	3	2795.48
				cDcTLLEINPLAETADNK	2	2077.24
				ILKESGmTLITAEDLDDAAEK	2	2279.44
				ESGmTLITAEDLDDAAEK	2	1925.28
				SGLQGGVHIVKAEEAESIASK	3	2111.08
				GITDEDAAKVVDGLALK	2	1715.19
				VPIDVFKGITDEDAAK	2	1719.32
				LSLTNEmYFAITLDR	2	1803.28
				DALKNmFPSEKEIVVK	2	1864.4
				LNIHEYQGAELmGK	2	1619.18
				cDVIASGIVNAAK	2	1317.91
				GAAAGSVQEVKDALK	2	1444.17
				DTTQEDPREVAAAK	2	1530.91
				AILVNIFGGImK	2	1293.08
				YPDmIIKVPIDVFK	3	1694.52
				AEEAESIASKmLGQILVTK	3	2035.24
				KTAGPLIIAcSK	2	1258.87
				LNFDDNAAFR	2	1182.98
269	39.80/5.96	40.53/5.77	379	RGDSVFYGPLPELVSSENPPK	3	2289.01	91.81	35.88	10	0	100	sb03g003550	1-aminocyclopropane-1-carboxylate oxidase
				TLLGLLSQGLGLR	2	1341.95
				GLVESGVSSVPELFR	2	1575.97
				TTGGVNYSSNVDLYNSPAASWR	2	2359.39
				AEALEDAScADGK	2	1336.8
				YSNFTmSEFYGK	2	1489.34
				ALLDNFKLSS	2	1107.97
				AEVLEWEAR	2	1102.72
				AFNELPAAER	2	1117.75
				VSIGIFFSPGKR	2	1307.92
271	22.1/4.29	17.3/4.48	173	SSSAAESPASVEEGIEVLQAYSK	3	2339.33	33.02	61.85		1e-106	100	sb02g038200	MFP 1 attachment factor
				AAAAVEAEAFAAASK	2	1379.08
				RLVQTLAAPSVLSQR	2	1640.23			6
				AAEALLPSLSIWPPSQR	2	1836.54
				LVQTLAAPSVLSQR	2	1483.29
				SAAAAAAPPAEGSAKEEPEEDSSAAAP	3	3540.41
274	30.37/5.54	29.72/5.40	270	KDDGTIEPFEmIGAAR	3	1766.4	44.68	40.74		0	100	sb04g002770	Proteasome subunit alpha type-1
				LFQVEYAmEAVK	2	1444.15
				LSSSNcTVAIVGR	2	1363.88
				VAEHAGVALAGLTADGR	2	1608.28			7
				NEcINHSFVYEAPLPISR	3	2145.88
				THAVLAAVNKPASELSSYQR	3	2142.58
				DALSAIKETLQGEK	2	1502.7
291	59.90/6.03	58.37/6.05	530	AmEVLADILQNSNLDQAR	2	2016.54	115.11	32.45		0	100	sb01g043060	Mitochondrial-processing peptidase subunit beta
				AAINDIAESVmAFNTNYK	2	1987.69
				YASPVPSHADHTAILAAPETR	2	2204.27
				EDLENYIATHYTAPR	2	1793.17
				LSTDPTTTNmLVAK	2	1508.3			10
				AAGVAHFVEHmLFK	2	1572.89
				RSAAQLEQEIEDmGGHLNAYTSR	3	2593.13
				TATVGVWIDAGSRYENEK	2	1995.69
				DTGLFGVYAVAK	2	1241.11
				VTTLPNGLRVATESSLAAR	3	1955.84
298	26.94/5.86	27.31/7.69	240	SGLIDHLGIEPLmmEALEK	3	2129.23	16.93	22.92		3e-172	100	sb04g002620	Probable ATP synthase 24 kDa subunit
				KEcVEAmETQLK	2	1482.13			4
				REEFQDEEmPDVR	3	1695.9
				IEEELELEIAK	2	1316.05
299	33.81/6.18	29.76/6.06	273	NPLQEYQVAHIPGALFFDVDGISDR	3	2802.27	16.93	22.92		0	100	sb08g020860	Thiosulfate/3 mercaptopyruvate sulfurtransferase 2 isoform X1
				ASGYDVESSASSDAILK	2	1700.1
				LQPHLLWSLDQVK	2	1576.68
				IWVLDGGLPQWR	2	1439.99
				TEVAIYDGSWTEWGAHPDTPVATAV	2	2673.64			4
				LQPHLLWSLDQVKENIK	3	2060.12
				cVPFPQVLDSSQK	2	1504.1
				VYLGQSVGR	2	978.859
				TSSLPHmLPSEK	2	1342.99
300	50.26/5.85	47.20/5.56	423	LFITQTGSDSWVVR	2	1609.3	183.57	36.41		0	100	sb04g020180	Sucrose-phosphatase 1
				NIVVEETVGFSELK	2	1563.91
				IIYSGGQDLDILPQGAGK	2	1844.98
				LmIVSDLDHTmVDHHDEENLSLLR	3	2865.12
				cAAGIIQAIGHFKLGPNISPR	3	2219.57			10
				TWLNGYSSGVEQASKL	2	1740.52
				AESPEGFVLTHIQK	2	1555.94
				FDLWESEGDVR	2	1352.76
				EASFKPTDAVVK	2	1292.2
				GQALAYLLK	2	977.767
*302a	33.79/6.42	37.31/8.89	346	AAGADIVGGEDLIEQIK	2	1699.17	97.18	41.04		0	100	sb09g019170	50S ribosomal protein L1, chloroplastic protein
				LNIKEmLDYGLDSSD	2	1729.29
				KDYDVPTAISLmK	2	1496.23
				IAVLTQGEKIDEAR	2	1544
				AGTVSPNITQAIEEFKK	2	1833.25			10
				GQYDDDDDGYEGGR	2	1561.51
				VDFPEEDLIANFmAVVR	2	1981.17
				VDKSGIVHIPFGK	2	1397.25
				VAGLGKILGPR	2	1080.12
				GPAFTAPTRPR	2	1170.34
*302b	33.79/6.42	36.20/6.30	334	DKSVLLWDLENPVHSTPESGVTADYGVPK	3	3153.84	29.66	32.34		0	100	sb09g027690	Guanine nucleotide-binding protein beta subunit
				AHNGEVTAIATPIDNSPFIVSASR	3	2468.37
				FSPNTFQPTIVSGSWDR	2	1940.07			6
				DILSVAFSVDNR	2	1335.91
				YWLcAATQDSVK	2	1442.11
				DGVTLLWDLAEGKR	2	1573.35
303	18.80/6.40	42.42/6.76	386	VYcVLNSPHVHKDSR	2	1811.11	46.22	8.03		1e-166	93.83	sb01g044040	30S ribosomal protein S10-alpha, chloroplastic, Zea Mays (GI: PWZ06987)
				RVYcVLNSPHVHKDSR	3	1967.25
				LRSYWVPLIEDScKK	3	1893.61			5
				VYcVLNSPHVHK	2	1453.06
				SYWVPLIEDScKK	2	1625.16
304	17.5/6.68	26.20/9.26	249	IVIGLYGDDVPQTAENFR	2	2007.28	104.2	50.2		0	100	sb09g000350	Peptidyl-prolyl cis-trans isomerase
				ITNKVYFDISIGNPVGK	2	1865.1
				HVVFGQVLEGmDIVK	2	1687.07
				VISDFmIQGGDFDKGNGTGGK	2	2159.22			7
				KVVISEcGELPVV	2	1429.05
				LVHTGPGVVSmANAGPNTNGSQFFIcTVK	3	3020.24
				ALcTGEKGFGYK	2	1330.92
305	17.5/6.53	26.20/9.26	249	IVIGLYGDDVPQTAENFR	2	2007.04	56.66	38.55		0	100	sb09g000350	Peptidyl-prolyl cis-trans isomerase
				ITNKVYFDISIGNPVGK	2	1865.27
				KVVISEcGELPVV	2	1588.03			6
				VISDFmIQGGDFDKGNGTGGK	2	2159.18
				HVVFGQVLEGmDIVK	2	1687.47
				ALcTGEKGFGYK	2	1331.27
306	31.6/5.40	33.90/5.25	309	GADVVISTLGSLQIADQTR	2	1944.26	446.13	64.4		0	100	sb03g008760	Isoflavone reductase-like IRL
				VVFVEEGDIGTYTVLAADDPR	2	2266.16
				TLYIKPPANTLSHNELLSLWEK	3	2567.81
				QIQESPIPLNIILAIGHAAYVR	3	2416.02
				TGIVEPGKSILAGK	2	1369.99
				SKILVVGGTGYLGR	2	1419.68
				AALLQSFQDAGVTLVKGDLYDQASLVSAVK	3	3108.24			13
				RFFPSEFGLDVDR	2	1585.13
				GEQTGFEIDPAKR	2	1447.99
				RVDATELYPDVK	2	1406.13
				YTTVDEYLNR	2	1273.67
				LGHPTVALVR	2	1062.72
				FFPSEFGLDVDRTGIVEPGK	2	2210.29
307	72.61/5.48	72.57/5.82	678	IGQHmSGGGSGGSQSGSGPQGGGDQAPEAEYEEVKK	3	3349.15	240.5	40.41	16	0	98.38	sb01g017050	Heat shock 70 kDa protein Panicum miliaceum, (GI: RNL19808.1)
				GVNPDEAVAMGAAIQGGILR	2	1954.54
				SQVFSTAADNQTQVGIR	2	1822.4
				AKVELSSTSQTEINLPFITADASGAK	2	2678.85
				IINEPTAAALSYGmNNK	3	1823.56
				RQAVTNPQNTFFGTK	2	1708.95
				QYSPSQVGAFVLTK	2	1525.16
				VPKVQAVVSEIFGK	2	1500.31
				EVDEVLLVGGmTR	2	1434.14
				DKIPSEVASEIEAAIADLR	2	2027.22
				mKETAESYLGK	2	1273.01
				SSGGLSEADIQK	2	1191.27
				ALIDIRNNADTTIYSIEK	2	91.2676
				SKFESLVHNLIER	2	1572.49
				APNGDAWVETTDGK	2	1461.16
				AVITVPAYFNDAQR	2	1565.45
308	30.50/5.22	28.94/5.33	261	SDDLYQYILDTSVYPREPESmK	3	2665.8	56.59	46.74	6	0	0.9962	sb10g004540	Caffeoyl-CoA O-methyltransferase 1 isoform X2
				LGGLIGYDNTLWNGSVVLPDDAPmRK	3	2818.4
				EGPALPVLDDLIADEK	2	1694.68
				NHGSFDFVFVDADK	2	1597.92
				HPWNLmTTSADEGQFLNmLIK	3	2478.84
				ALAADERVEIcQLPVGDGVTLcR	3	2542.22
